# Supplementary material for: Community based distribution of oral HIV self-testing kits in Zambia: a cluster-randomised trial nested in four HPTN 071 (PopART) intervention communities
Source: PubMed Central journal article supplement (PMC6361868; doi:10.1016/s2352-3018(18)30258-3), 2018-12-21
Supplement: mmc1.pdf [file mmc1.pdf]

# THE LANCET HIV

## Supplementary appendix

This appendix formed part of the original submission and has been peer reviewed. We post it as supplied by the authors.

Supplement to: Mulubwa C, Hensen B, Phiri MM, et al, for the HPTN 071 (PopART) Study Team. Community based distribution of oral HIV self-testing kits in Zambia: a cluster-randomised trial nested in four HPTN 071 (PopART) intervention communities. *Lancet HIV* 2018; published online Dec 21. [http://dx.doi.org/10.1016/S2352-3018\(18\)30258-3](http://dx.doi.org/10.1016/S2352-3018(18)30258-3).

**Appendices material for “Community based distribution of oral HIV self-testing kits in Zambia: a cluster-randomized trial nested in four HPTN 071 (PopART) intervention communities”**

**Appendices**

1. Type of HIV testing services selected by individuals eligible for an offer of and choosing to test for HIV in HIV self-testing zones
2. Description of cost components
3. Unit costs (US\$) by HIV self-testing and non-HIV self-testing groups
4. Enumeration and uptake of HIV testing in the HIV self-testing and non-HIV self-testing groups among males
5. Enumeration and uptake of HIV testing in the HIV self-testing and non-HIV self-testing among females
6. Social harms matrix

**Appendix 1. Type of HIV testing services selected by individuals eligible for an offer of and choosing to test for HIV in HIV self-testing zones**

|                      | HIV self-testing    |                       |                                    | Overall<br>(%, n/N) | HIV finger-prick RDT<br>(%, n/N) | Overall<br>(%, n/N) |
|----------------------|---------------------|-----------------------|------------------------------------|---------------------|----------------------------------|---------------------|
|                      | Supervised (%, n/N) | Unsupervised (%, n/N) | Secondary distribution (%,<br>n/N) |                     |                                  |                     |
| <b>Overall</b>       | 81.7 (3,727/4,561)  | 11.2 (511/4,561)      | 7.1 (323/4,561)                    | 56.4 (4,561/8080)   | 43.6 (3,519/8,080)               | 86.5 (8,080/9,343)  |
| <b>Male</b>          | 73.9 (1,484/2,008)  | 12.0 (241/2,008)      | 14.1 (283/2,008)                   | 56.1 (2,008/3,582)  | 43.9 (1,574/3,582)               | 88.0 (3,582/4,070)  |
| <b>Female</b>        | 87.9 (2,243/2,553)  | 10.6 (270/2,553)      | 1.6 (40/2,553)                     | 56.8 (2,553/4,498)  | 43.2 (1,945/4,498)               | 85.3 (4,498/5,273)  |
| <b>Overall 16-29</b> | 85.8 (2,327/2,712)  | 10.2 (277/2,712)      | 4.0 (108/2,712)                    | 56.8 (2,712/4,777)  | 43.2 (2,065/4,777)               | 90.8 (4,777/5,262)  |
| <b>Males 16-29</b>   | 82.9 (962/1,161)    | 9.8 (114/1,161)       | 7.3 (85/1,161)                     | 56.3 (1,161/2,063)  | 43.7 (902/2,063)                 | 91.6 (2,063/2,253)  |
| <b>Female 16-29</b>  | 88.0 (1,365/1,551)  | 10.5 (163/1,551)      | 1.5 (23/1,551)                     | 57.1 (1,551/2,714)  | 42.9 (1,163/2,714)               | 90.2 (2,714/3,009)  |
| <b>Overall 30+</b>   | 75.7 (1,400/1,849)  | 12.7 (234/1,849)      | 11.6 (215/1,849)                   | 56.0 (1,849/3,303)  | 44.0 (1,454/3,303)               | 80.9 (3,303/4,081)  |
| <b>Male 30+</b>      | 61.6 (522/847)      | 15.0 (127/847)        | 23.4 (198/847)                     | 55.8 (847/1,519)    | 44.2 (672/1,519)                 | 81.2 (1,519/1,871)  |
| <b>Female 30+</b>    | 87.6 (878/1,002)    | 10.7 (107/1,002)      | 1.7 (17/1,002)                     | 56.2 (1,002/1,784)  | 43.8 (782/1,784)                 | 78.8 (1,784/2,264)  |

## Appendix 2: Description of cost components

| Component                                       | Description                                                                                                                                                                                                                                                                                                                                                                                                                                    |
|-------------------------------------------------|------------------------------------------------------------------------------------------------------------------------------------------------------------------------------------------------------------------------------------------------------------------------------------------------------------------------------------------------------------------------------------------------------------------------------------------------|
| <b>Intervention costs</b>                       | These were the additional costs of introducing HIV self-testing into PopART. Costs of HIV self-testing: procuring HIV self-testing kits, including the actual cost of kits and transportation up to central level. Cost of supplies: including cost of supplies that directly support implementation of the intervention; e.g. stationary (including teaching aid reproduction) and extra bags for the HIV self-testing kits. Personnel costs. |
| <b>Research Costs</b>                           | Included costs which were related to impact evaluation, social science and economic evaluation                                                                                                                                                                                                                                                                                                                                                 |
| <b>Community Sensitization and mobilization</b> | Costs of additional community engagement activities related to HIV self-testing distribution including personnel, supplies, transportation and travel and capital costs. For example the cost of sensitization meetings with Ministry of Health at central, provincial and district levels and community sensitization meetings.                                                                                                               |
| <b>Quality Assurance</b>                        | Costs of specific QA/QC activities related to HIV self-testing disaggregated by personnel, supplies, transportation and travel, and capital costs.                                                                                                                                                                                                                                                                                             |
| <b>Project coordination</b>                     | These generally included shared costs related to administrative and project coordination activities including supervision and mentorship, mostly incurred at central office. Costs associated with technical support from central office – travel costs such as per diem, accommodation and transportation – including personnel costs.                                                                                                        |
| <b>Set-up costs</b>                             | These are costs which were incurred before 1 February 2017 to set up the project                                                                                                                                                                                                                                                                                                                                                               |
| <b>Trainings</b>                                | Costs of initial trainings; Initial protocol training for field staff.                                                                                                                                                                                                                                                                                                                                                                         |
| <b>PopART Community intervention costs</b>      | All costs related to PopART community finger prick RDT activities                                                                                                                                                                                                                                                                                                                                                                              |
| <b>Cost of the intervention (HIVST) Arm</b>     | Intervention costs plus PopART community intervention costs                                                                                                                                                                                                                                                                                                                                                                                    |
| <b>Cost of non-HIV self-testing</b>             | PopART community intervention costs                                                                                                                                                                                                                                                                                                                                                                                                            |

### Appendix 3. Unit costs (US\$) by HIV self-testing and non-HIV self-testing groups

| Item                                                            | Non-HIV self-testing group | HIV self-testing group |
|-----------------------------------------------------------------|----------------------------|------------------------|
| <i>Total intervention costs</i>                                 | <i>Value (US\$)</i>        | <i>Value (US\$)</i>    |
| <b>PopART Costs</b>                                             |                            |                        |
| Staff costs                                                     | 145,694                    | 145,694                |
| General supplies                                                | 3,693                      | 3,693                  |
| First line testing supplies                                     | 22,004                     | 9,927                  |
| Second line test supplies                                       | 677                        | 296                    |
| <i>Sub-total costs</i>                                          | <i>172,069</i>             | <i>159,610</i>         |
| <b>HIV self-testing costs</b>                                   |                            |                        |
| Personnel                                                       |                            | 48,456                 |
| Administration                                                  |                            | 9,844                  |
| Transportation & Travel                                         |                            | 6,796                  |
| Supplies                                                        |                            | 4,089                  |
| HIVST kit                                                       |                            | 13,683                 |
| Equipment                                                       |                            | 613                    |
| Parallel HIV testing*                                           |                            | 654                    |
| <i>Sub-total costs</i>                                          |                            | <i>84,135</i>          |
| <b>Total Costs</b>                                              | <b>172,069</b>             | <b>243,745</b>         |
| <b>Outcomes</b>                                                 |                            |                        |
|                                                                 | <i>number</i>              | <i>number</i>          |
| Number of persons enumerated                                    | 13,706                     | 13,267                 |
| Number of persons tested                                        | 7800                       | 8080                   |
| Number of Newly HIV+ persons identified                         | 204                        | 237                    |
| HIVST kits distributed                                          |                            | 4561                   |
| Number confirmed HIV self-testing HIV+ persons <sup>&amp;</sup> |                            | 109                    |
| <b>Incremental number of individuals tested</b>                 |                            | <b>280</b>             |
| <b>Cost-effectiveness (US\$)</b>                                |                            |                        |
|                                                                 | <i>Value (US\$)</i>        | <i>Value (US\$)</i>    |
| Cost per person enumerated                                      | 12.55                      | 18.37                  |
| Cost per person tested                                          | 22.06                      | 30.17                  |
| Cost per newly HIV+ person identified                           | 843.47                     | 1028.46                |
| Cost per HIV self-test kit distributed                          |                            | 18.45                  |
| Cost per confirmed HIV self-testing HIV+                        |                            | 771.88                 |
| <b>Incremental costs</b>                                        |                            | <b>71,675.78</b>       |
| <b>Incremental cost per person tested</b>                       |                            | <b>255.98</b>          |

**Key:** <sup>&</sup>Confirmed HIV self-testing HIV+ - individuals who self-tested HIV positive and accepted a confirmatory test

\*Parallel HIV testing is when Determine HIV and UniGold tests are performed to confirm an HIV test result

## Appendix 4: Enumeration and uptake of HIV testing in the HIV self-testing and non-HIV self-testing groups among males

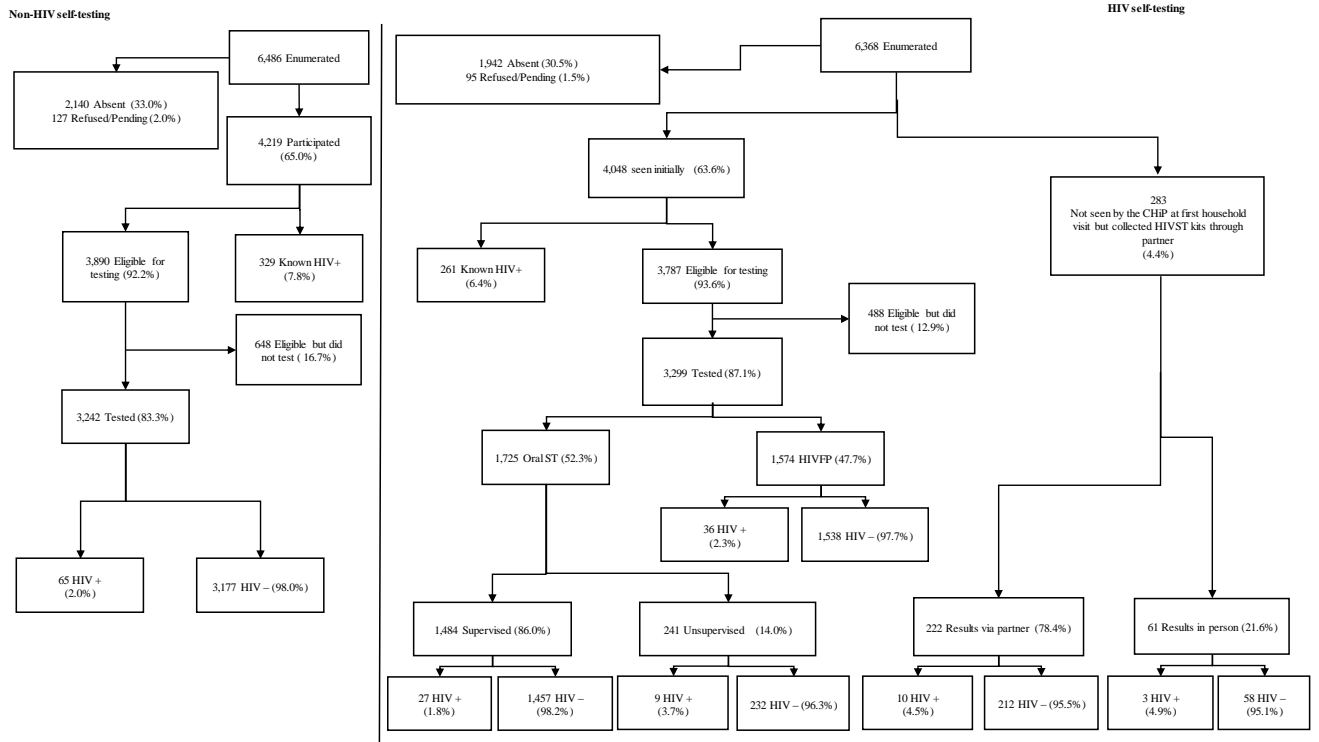

## Appendix 5: Enumeration and uptake of HIV testing in the HIV self-testing and non-HIV self-testing groups among females

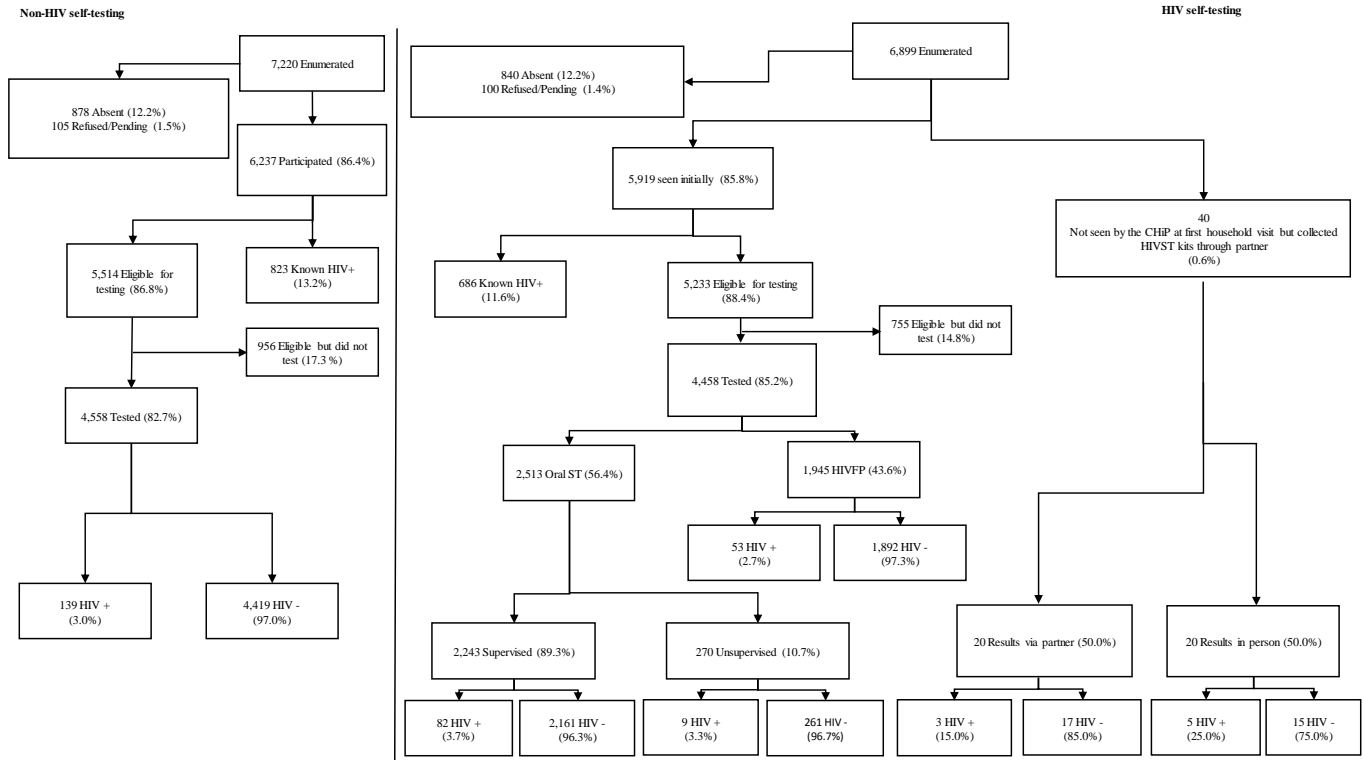

**Appendix 6: Social harms matrix**

| Source 1                                 | Source 2                                | Type                                                 |
|------------------------------------------|-----------------------------------------|------------------------------------------------------|
| 20170329_Z6_FGD                          | FGD (CHiPs)                             | Threatening harm/ divorce                            |
| 20170329_Z6_FGD                          | FGD (CHiPs)                             | Couple separated                                     |
| 20170317_Z5_FGD                          | FGD (CHiPs)                             | Invasion of privacy                                  |
| 20170329_Z1_FGD                          | FGD (CHiPs)                             | Deceit / forced testing                              |
| 20170321_Z6_IDI                          | Male (adolescent, accepted, supervised) | Deceit / forced testing                              |
| 20170220_Z6_HIVST                        | FGD (CHiPs observation)                 | Forced testing                                       |
| Monitoring visit                         | Case 1                                  | Attempted forced testing                             |
| Monitoring visit                         | Case 3                                  | Emotional distress                                   |
| Monitoring visit                         | Case 4                                  | Marriage Separation                                  |
| Monitoring visit                         | Case 10                                 | Emotional distress                                   |
| Monitoring visit                         | Case 11                                 | Emotional distress                                   |
| Monitoring visit                         | Case 14                                 | Blackmail (using results as evidence against spouse) |
| Monitoring visit                         | Case 17                                 | GBV and Threatening suicide                          |
| <b>Key:</b> Z1, Z5 and Z6 are site codes |                                         |                                                      |
